# Supplementary material
Source: HighWire-hosted journal article supplement (https://thorax.bmj.com/content/thoraxjnl-2017-210017)
Supplement: inline-supplementary-material-1 [file inline-supplementary-material-1.pdf]

## **ONLINE-SUPPLEMENTARY APPENDIX**

### **Duration of the efficacy of omalizumab after treatment discontinuation in “real life” severe asthma**

María del Carmen Vennera MD<sup>1,2</sup>, Carlos Sabadell MD<sup>3</sup>, César Picado MD, FERS<sup>1,2</sup> and the Spanish Omalizumab Registry.

1.- Department of Pneumology and Respiratory Allergy, Hospital Clinic. IDIBAPS. Universitat de Barcelona. Barcelona, Spain.

2.- Centro de Investigaciones Biomédicas en Red de Enfermedades Respiratorias (CIBERES). Spain.

3.- Department of Pneumology. Hospital de Figueres. Figueres. Girona, Spain.

### **Statistical Analysis**

For comparisons between visits in continuous variables, parametric (paired Student's t-test), and non-parametric tests (Wilcoxon) were used when appropriate. For comparisons between groups, parametric (Student's t-test or ANOVA) and non-parametric tests (Mann–Whitney), were used in continuous variables, and chi-square test or Fisher's exact were used in categorical variables. A level of statistical significance of 0.05 was applied in all the statistical tests.

**TABLE E1: Clinical variables and lung function test before initiation of omalizumab therapy. Comparison between Success and Failure groups**

|                                                                   | Success                                                   |              | Failure                                                   |              | p-values      |
|-------------------------------------------------------------------|-----------------------------------------------------------|--------------|-----------------------------------------------------------|--------------|---------------|
|                                                                   | n                                                         | %            | n                                                         | %            |               |
| <b>Prick test</b>                                                 | <b>37</b>                                                 | <b>100.0</b> | <b>12</b>                                                 | <b>100.0</b> | <b>0.3154</b> |
| Positive                                                          | 32                                                        | 86.5         | 12                                                        | 100.0        |               |
| Negative                                                          | 5                                                         | 13.5         | 0                                                         | 0.0          |               |
| <b>Chronic Rhinosinusitis (CRS)</b>                               | <b>37</b>                                                 | <b>100.0</b> | <b>12</b>                                                 | <b>100.0</b> | <b>0.1391</b> |
| Yes                                                               | 24                                                        | 64.9         | 11                                                        | 91.7         |               |
| No                                                                | 13                                                        | 35.1         | 1                                                         | 8.3          |               |
| <b>CRS with Nasal Polyps (CRSwNP)</b>                             | <b>37</b>                                                 | <b>100.0</b> | <b>12</b>                                                 | <b>100.0</b> | <b>0.1151</b> |
| Yes                                                               | 15                                                        | 40.5         | 8                                                         | 66.7         |               |
| No                                                                | 22                                                        | 59.5         | 4                                                         | 33.3         |               |
| <b>Non-steroidal anti-inflammatory drugs (NSAIDs) intolerance</b> | <b>37</b>                                                 | <b>100.0</b> | <b>12</b>                                                 | <b>100.0</b> | <b>0.0942</b> |
| Yes                                                               | 11                                                        | 29.7         | 7                                                         | 58.3         |               |
| No                                                                | 26                                                        | 70.3         | 5                                                         | 41.7         |               |
|                                                                   | Success                                                   |              | Failure                                                   |              | P-values      |
|                                                                   | Mean (DT)<br>Median (25 <sup>TH</sup> -75 <sup>TH</sup> ) |              | Mean (DT)<br>Median (25 <sup>TH</sup> -75 <sup>TH</sup> ) |              |               |
| <b>Age (years)*</b>                                               | 56.3±11.8                                                 |              | 53.8±9.4                                                  |              | <b>0.4958</b> |
| <b>BMI (kg/m<sup>2</sup>)*</b>                                    | 28.2±6.4                                                  |              | 25.9±3.9                                                  |              | <b>0.2591</b> |
| <b>Years of asthma</b>                                            | 24.0±15.1                                                 |              | 26.1±16.1                                                 |              | <b>0.6191</b> |
| <b>Asthma control test (ACT)</b>                                  | 15.1 ± 5.5<br>15.0 (10.0-20.0)                            |              | 12.4 ± 5.2<br>13.0 (10.0-15.0)                            |              | <b>0.1574</b> |
| <b>Exacerbation Rate (ER)</b>                                     | 4.4 ± 3.3<br>3.0 (2.0-6.0)                                |              | 4.8 ± 3.9<br>3.5 (1.5-9.5)                                |              | <b>0.8613</b> |
| <b>FEV1 (%)</b>                                                   | 63.6 ± 20.3<br>61.8 (51.7-70.3)                           |              | 68.3 ± 19.4<br>70.7 (59.6-81.6)                           |              | <b>0.4904</b> |

Note \*: Age and BMI at the cessation (VC) of treatment with omalizumab

**Asthma treatment before initiation of omalizumab therapy (PT) and prior to cessation (VC). Comparison between Success and Failure groups.**

**TABLE E2: Continuous oral corticosteroid therapy**

| VISIT                          | Oral Corticosteroids | Groups n (%) |           | Total      | P      |
|--------------------------------|----------------------|--------------|-----------|------------|--------|
|                                |                      | Success      | Failure   |            |        |
| Pre-treatment Visit (PT)       | No                   | 27 (73%)     | 12 (100%) | 39 (79,6%) | 0,0926 |
|                                | Yes                  | 10 (27%)     | 0 (0%)    | 10 (20,4%) |        |
| Treatment cessation Visit (VC) | No                   | 35 (94,6%)   | 12 (100%) | 47 (95,9%) | 1,0000 |
|                                | Yes                  | 2 (5,4%)     | 0 (0%)    | 2 (4,1%)   |        |

**TABLE E3: Long-acting  $\beta$ 2 agonists (Salmeterol, Formoterol)**

| VISIT                    | LABAs | Groups n (%) |            | Groups n (%) | P      |
|--------------------------|-------|--------------|------------|--------------|--------|
|                          |       | Success      | Success    |              |        |
| Pre-treatment (PT)       | No    | 2 (5,4%)     | 1 (8,3%)   | 3 (6,1%)     | 1,0000 |
|                          | Yes   | 35 (94,6%)   | 11 (91,7%) | 46 (93,9%)   |        |
| Treatment cessation (VC) | No    | 10 (27%)     | 2 (16,7%)  | 12 (24,5%)   | 0,7034 |
|                          | Yes   | 27 (73%)     | 10 (83,3%) | 37 (75,5%)   |        |

**TABLE E4: Inhaled corticosteroids (budesonide equivalent doses in  $\mu$ g)**

| Groups  | Pre-treatment visit (PT) | Cessation visit (VC) |
|---------|--------------------------|----------------------|
| Success | 1875.68 $\pm$ 1306.18    | 1130.00 $\pm$ 731.16 |
| Failure | 1600.00 $\pm$ 614.96     | 1048.00 $\pm$ 434.02 |

Note: Each cell shows the mean  $\pm$  standard deviation (SD). There were no statistically significant differences either at PT or VC
